# Supplementary material
Source: PubMed Central journal article supplement (PMC3248296)

**Supplemental Figure 1.** Flow cytometry gating strategy for the naive and memory subsets of CD4<sup>+</sup> T-cells in peripheral blood and gut mucosa. A representative HIV-infected individual and an uninfected control are shown. T<sub>N</sub>, naive CD4<sup>+</sup> T-cell subset; T<sub>CM</sub>, central memory CD4<sup>+</sup> T-cell subset; T<sub>EM</sub>, effector memory CD4<sup>+</sup> T-cell subset.

**Supplemental Figure 2.** Flow cytometry analysis of CCR9 and  $\beta$ 7 on CD4<sup>+</sup> T-cells. (a) Flow cytometry assay of  $\alpha$ 4 integrin chain on CCR9<sup>+</sup> $\beta$ 7<sup>hi</sup> CD4<sup>+</sup> T-cells. (b) FRET demonstration of the association between the  $\alpha$ 4 and  $\beta$ 7 chains at the surface of CCR9<sup>+</sup> CD4<sup>+</sup> T-cells:  $\alpha$ 4-PE was stimulated at 488 nm (donor) and  $\beta$ 7-APC emission was detected at 675 nm (acceptor). (c) Flow cytometry showing CCR9<sup>+</sup> $\beta$ 7<sup>hi</sup> CD4<sup>+</sup> T-cells labelled with the  $\alpha$ 4 $\beta$ 7 Act-1 mAb.

**Supplemental Figure 3.** High expression levels of  $\beta$ 7 integrin on gut CD8<sup>+</sup> T-cells and preserved MAdCAM-1 expression in the jejunum lamina propria of HIV-infected individuals. (a) Flow cytometry analysis of  $\beta$ 7 integrin on gut CD4<sup>+</sup> and CD8<sup>+</sup> T-cells of HIV-infected individuals (n=20). Median Fluorescence Intensities (MFI) of  $\beta$ 7 were measured after gating on  $\beta$ 7<sup>high</sup> CD4<sup>+</sup> and CD8<sup>+</sup> T-cells. Horizontal lines indicate median values. (b) MAdCAM-1 expression on blood vessels of the jejunum lamina propria of HIV-infected individuals (n=20) and uninfected individuals (n=9). Horizontal lines indicate median values. A representative HIV-infected individual and an uninfected control are shown. MAdCAM-1 (brown) was stained by immunohistochemistry and its expression on jejunum blood vessels was measured semiquantitatively.

**Supplemental figure 4.** Detection of IL-17 and IFN- $\gamma$ -producing cells. The CCR9<sup>+</sup> $\beta$ 7<sup>hi</sup> and CCR9<sup>-</sup> $\beta$ 7<sup>hi</sup> CD4<sup>+</sup> T-cell subsets were sorted from CD3<sup>+</sup>CD4<sup>+</sup> T-cells on a BD FACS Aria and then stimulated with PMA/ionomycin. Intracellular IL-17 and IFN- $\gamma$  staining, and flow cytometry analysis.

Control

HIV<sup>+</sup>

Peripheral blood

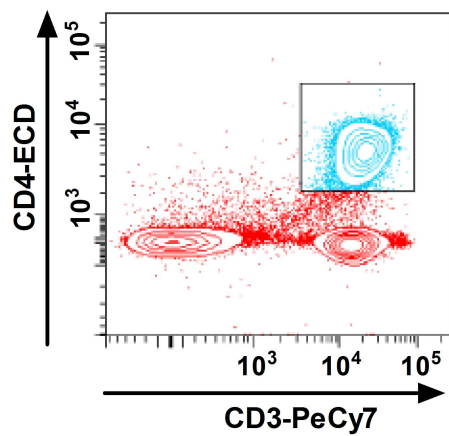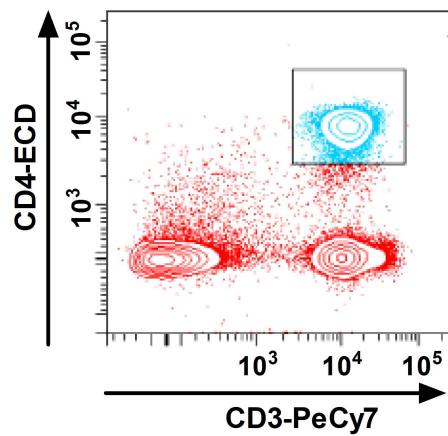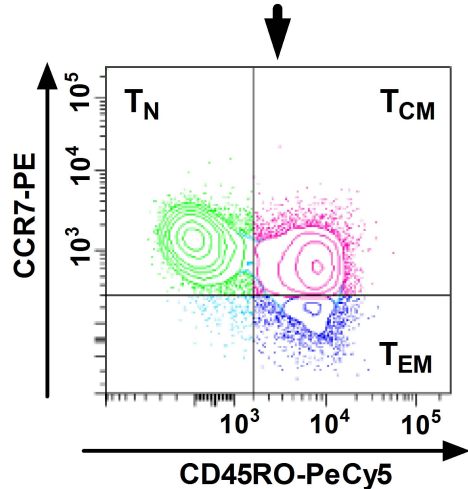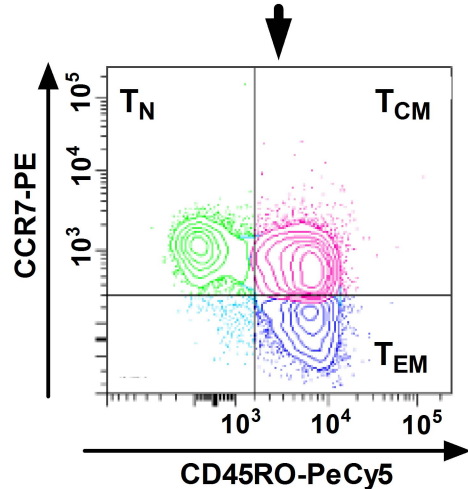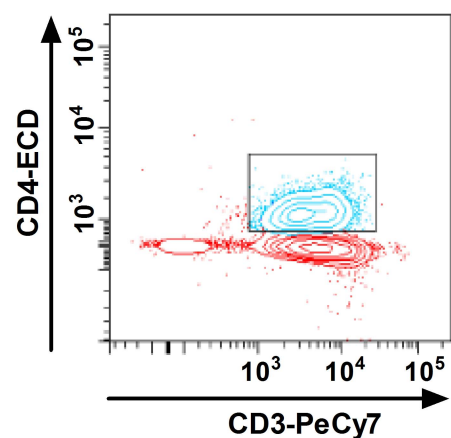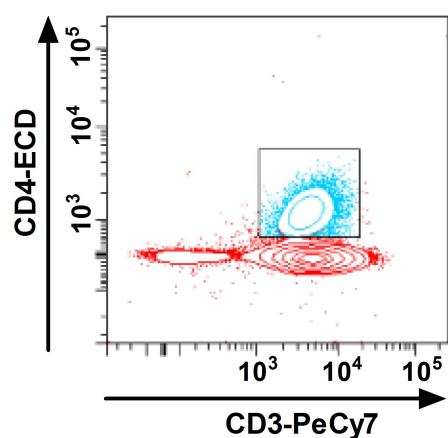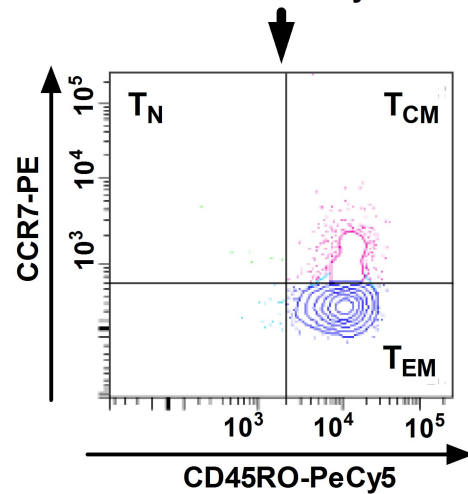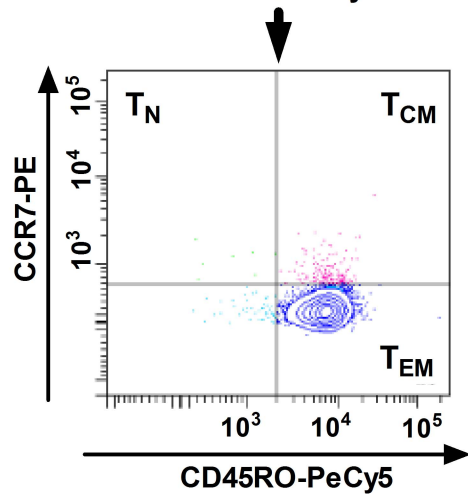

Gut

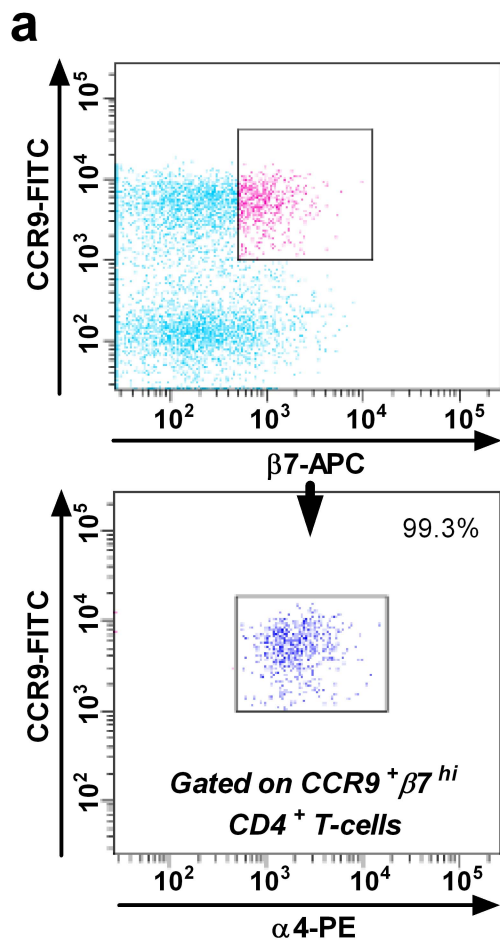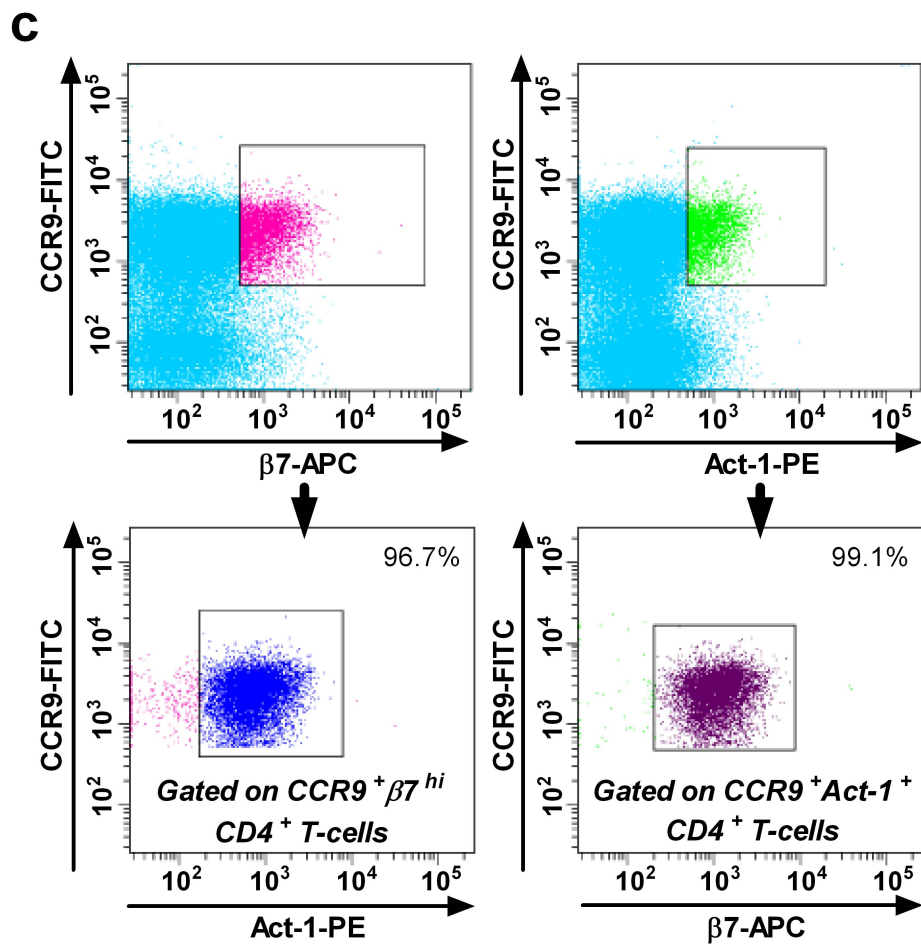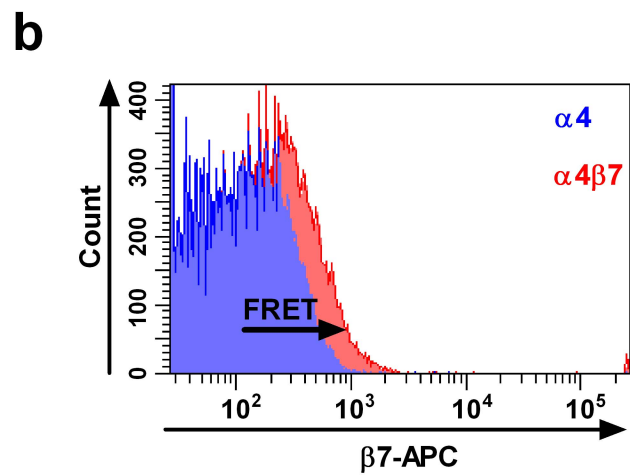

**a**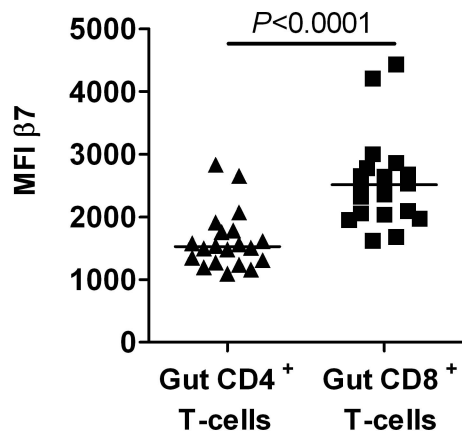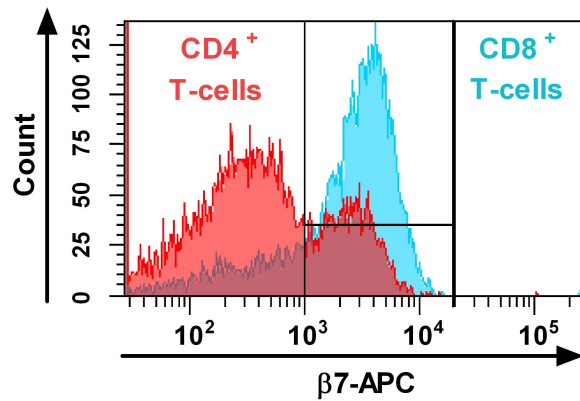**b**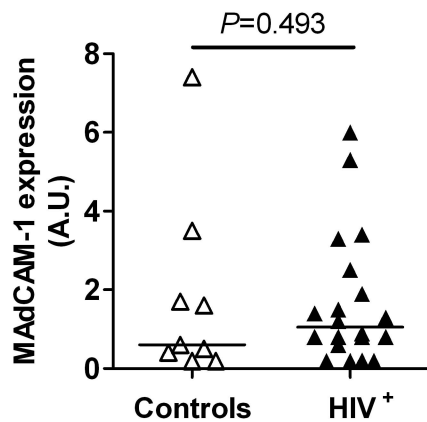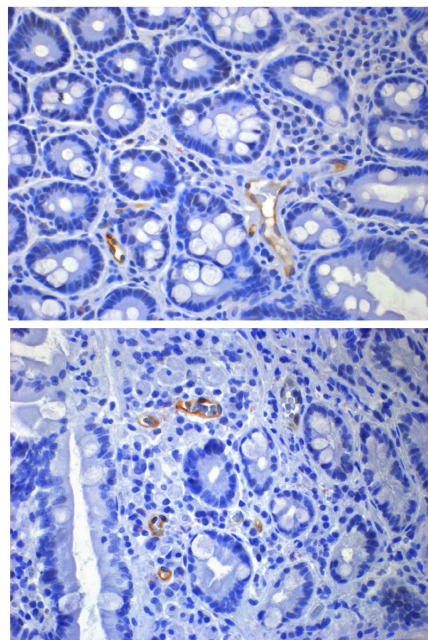**Control****HIV<sup>+</sup>**

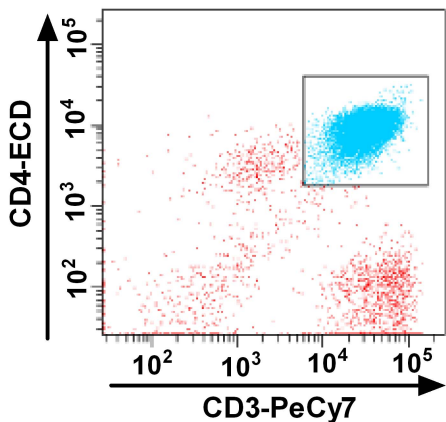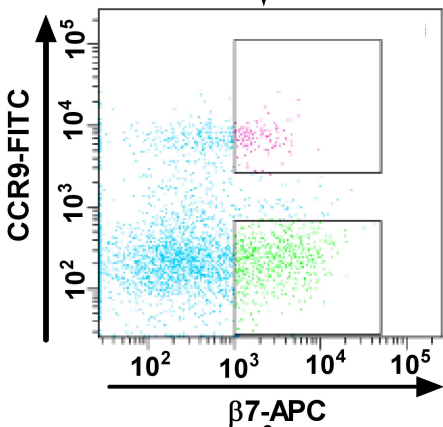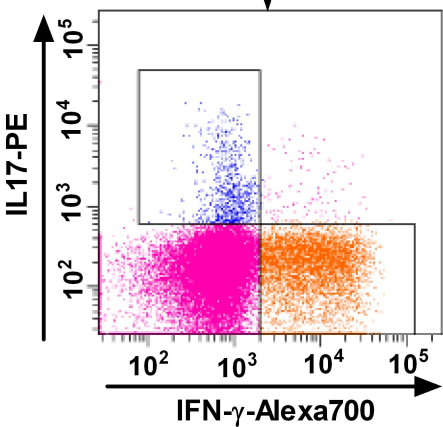

Supplement: JCI59011sd.pdf [file JCI59011sd.pdf]
